# Supplementary material for: Predicting earthquake-induced wavefield and stress dynamics in high-alpine mountains using full waveform modeling
Source: Research Square preprint supplement (doi:10.21203/rs.3.rs-5156490/v1), 2024-10-14
Supplement: Supplementary file 1 [file 07232dd774c328c879261832.docx]

Supplementary material to

Predicting earthquake-induced wavefield and stress dynamics in high-alpine mountains using full waveform modeling

Fabian Limberger1*, Georg Rümpker1,2, Jan Philipp Kruse1 and Thibault Duretz1

1Institute of Geosciences, Goethe-University Frankfurt, 60438 Frankfurt am Main, Germany
2Frankfurt Institute for Advanced Studies, 60438 Frankfurt am Main, Germany

*Correspondence to*: Fabian Limberger ([f.limberger@geophysik.uni-frankfurt.de](mailto:f.limberger@geophysik.uni-frankfurt.de))


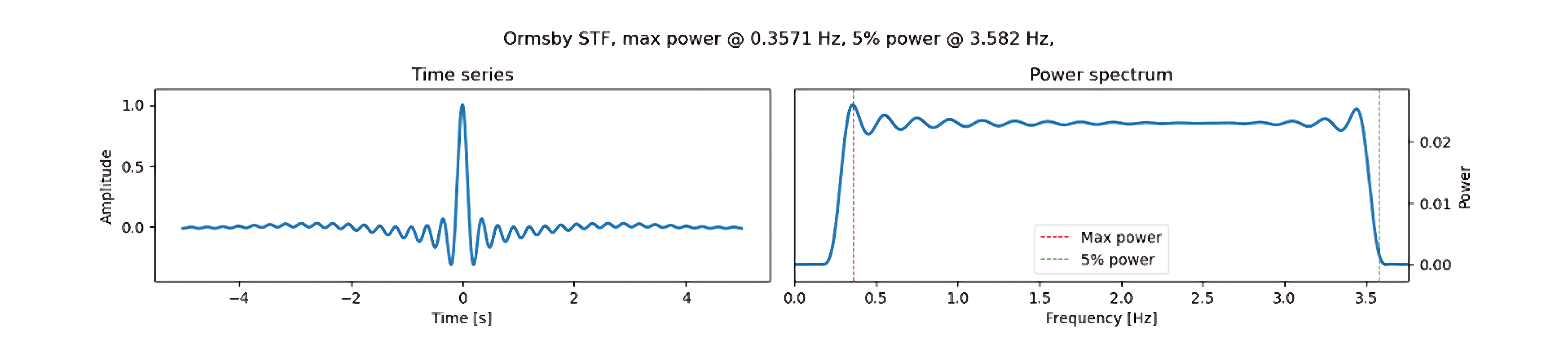


**Figure S1: Ormsby wavelet, which is used as a source time function. The spectra is flat between 0.3 Hz and 3.5 Hz.**


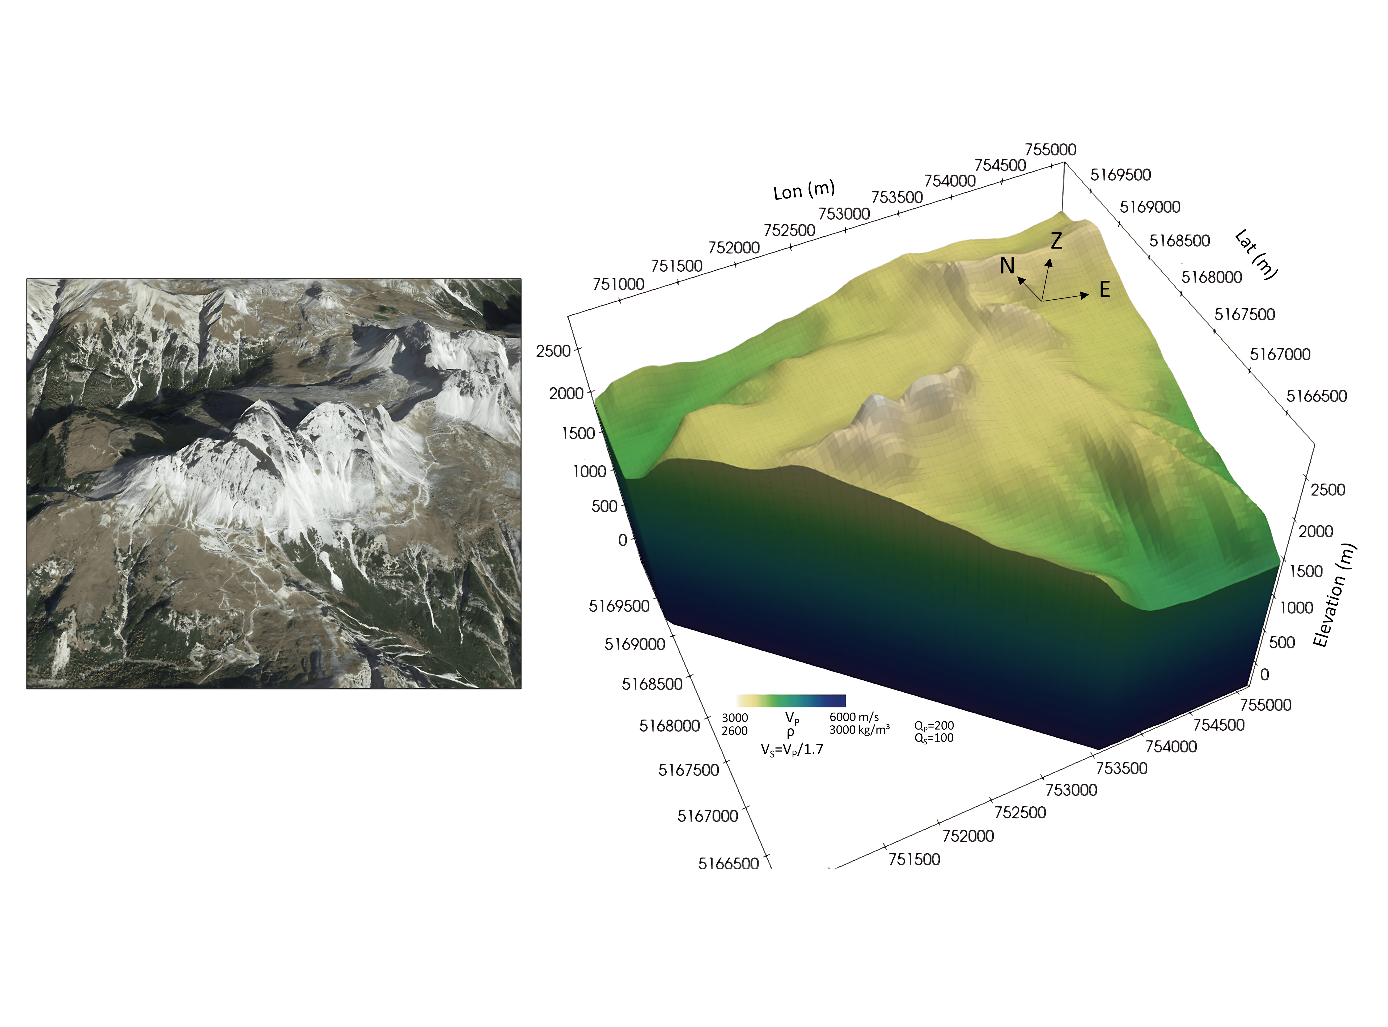
**Figure S2: Geometrical model and seismic velocity gradient of the Tre Cime di Lavaredo (Italy).** **Image data: ©Google Earth, 2024.**


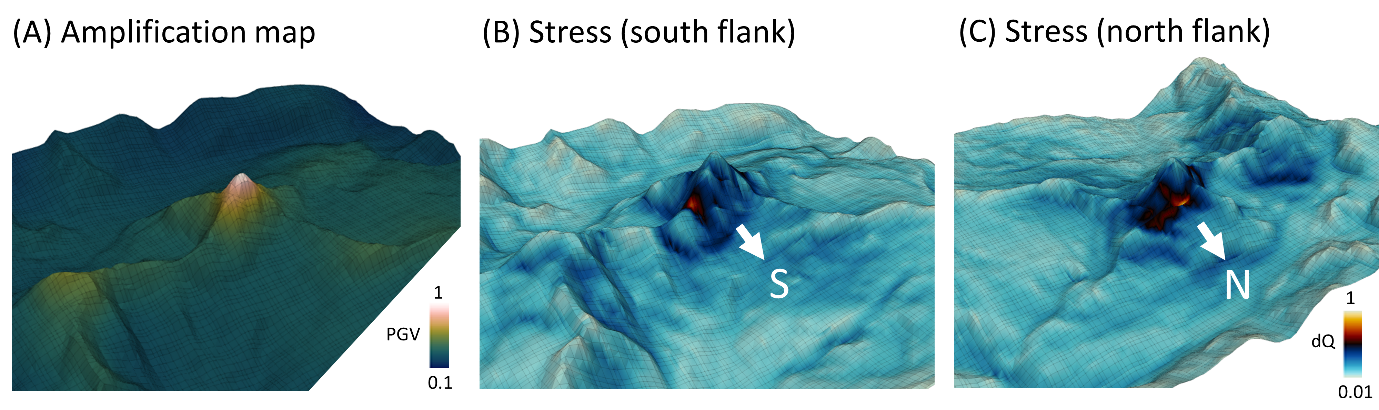


**Figure S3: Maximum PGV (A) and deviatoric stress across all time steps during the simulated earthquake in three dimensions. The incoming wave is a vertical plane wave with a dominant frequency of 0.4 Hz (according to Fig. 5A). The values (color scale) is normalized to the respective maximum.**

**In the following, the governing formulations to calculated the deviatoric stress are listed:**

The isotropic stress-strain relation (with plain strain ) is

and can be expressed with Poisson’s number and elastic modulus E

The out-of-plane stress (in z-direction) for a model domain in x-y-direction is

and can be expressed using the stress components

or

where the Poisson’s number is a function of the seismic velocities

The strain components are

where

The hydrostatic pressure is defined by

Hence, the deviatoric stress (2nd invariant of the deviatoric stress tensor) is given by
